# Supplementary material
Source: Springer Nature journal article supplement (https://www.springermedizin.de/resource/supplementary/12884_2011_484_MOESM2_ESM.pdf/9457942)

# Mean back pain intensity scores by groups of oxygen uptake

Mean pain intensity score,  
mm

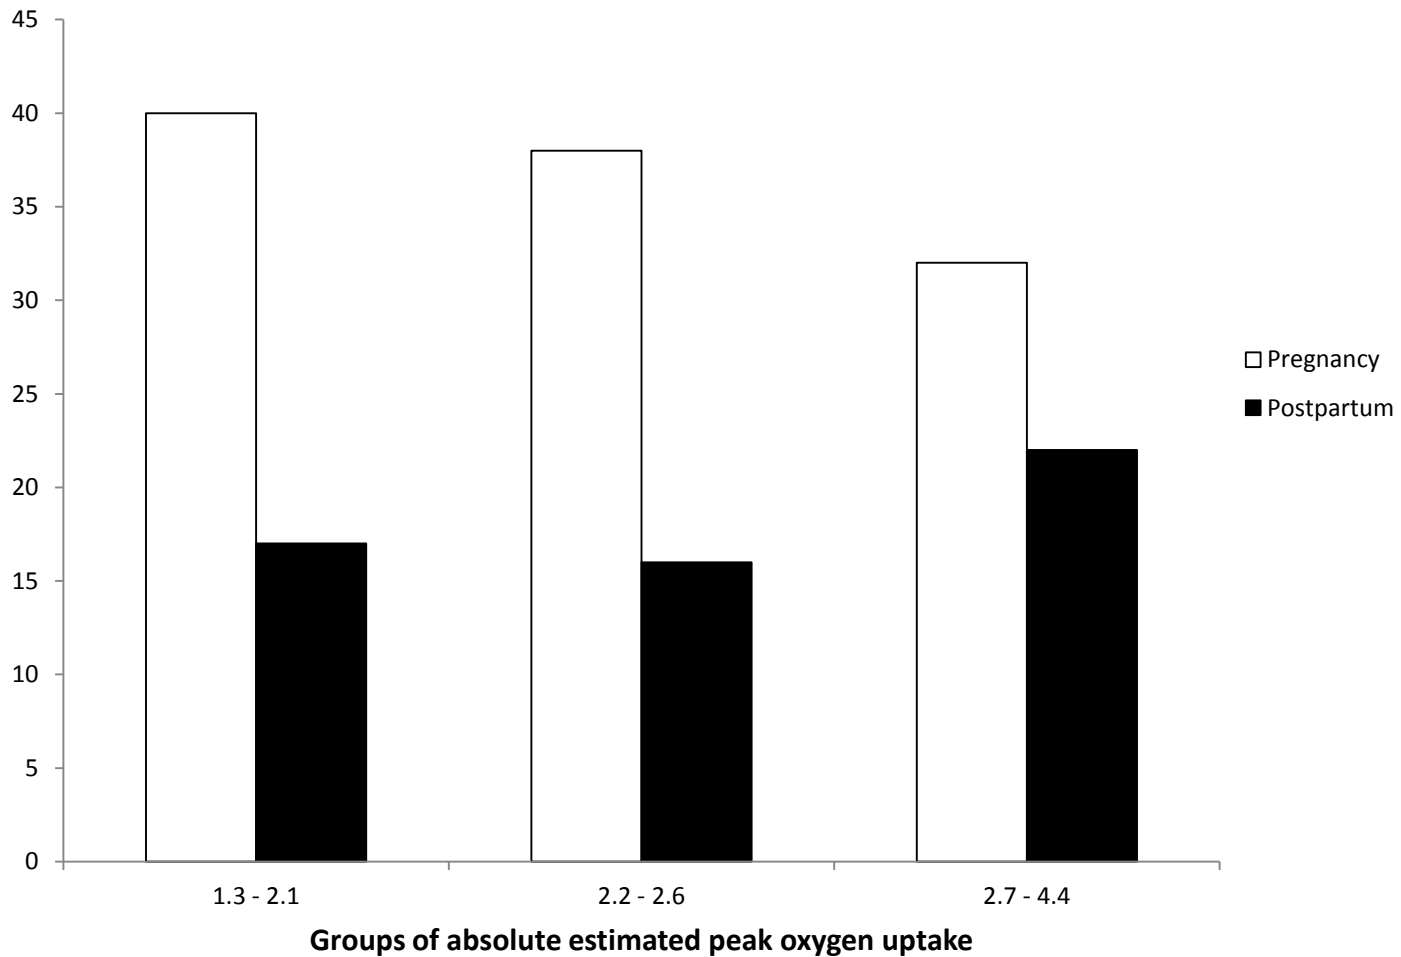

Supplement: MOESM2 [file 9457942]
